# Supplementary material for: Urbanization and Climate Change Shape Urban Latent Heat Flux: Three Critical Thresholds
Source: Research Square preprint supplement (doi:10.21203/rs.3.rs-7956152/v1), 2025-10-29
Supplement: Supplementary file 1 [file 3f5ce88170bdc0262fcfca49.docx]

**Supplementary Information for *Urbanization and Climate Change Shape Urban Latent Heat Flux: Three Critical Thresholds***

Yizhao Wei1, Jinhui Jeanne Huang1,2*

1College of Environmental Science and Engineering/Sino-Canada Joint R&D Centre for Water and Environmental Safety, Nankai University, Tianjin 300071, PR China

**Corresponding author:Jinhui Jeanne Huang**

1Sino-Canada R&D Centre on Water and Environmental Safety, College of Environmental Science and Engineering, Nankai University, Tianjin 300071, PR China;

2Shenzhen Research Institute of Nankai University, Shenzhen 518057, China

Email: huangj@nankai.edu.cn

**Supplementary Figures**


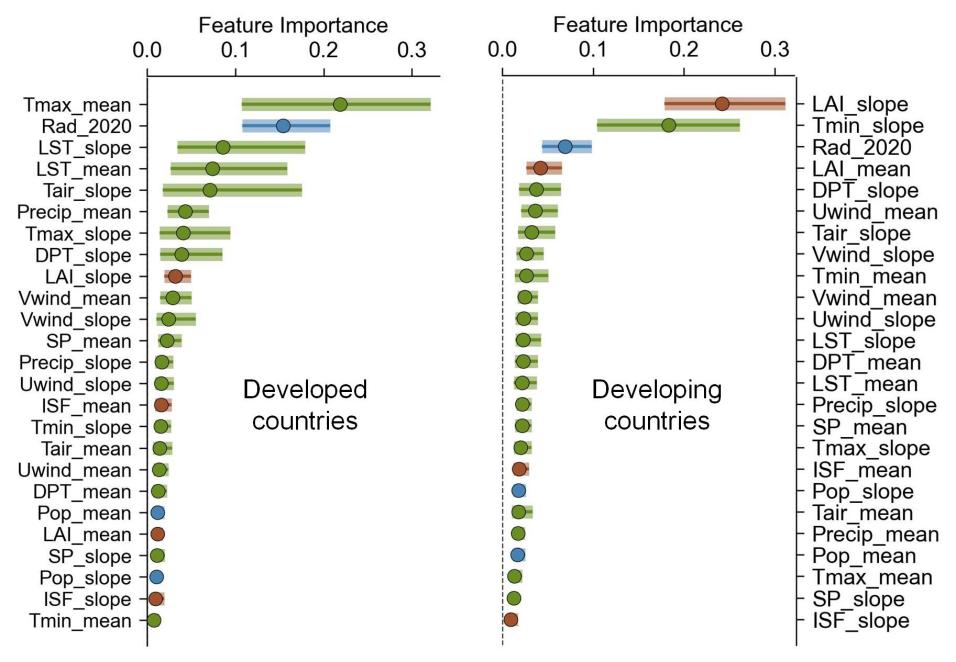


**Supplementary Figure 1.** Ranked importance of variables driving vegetation change trends in cities of developed and developing countries.


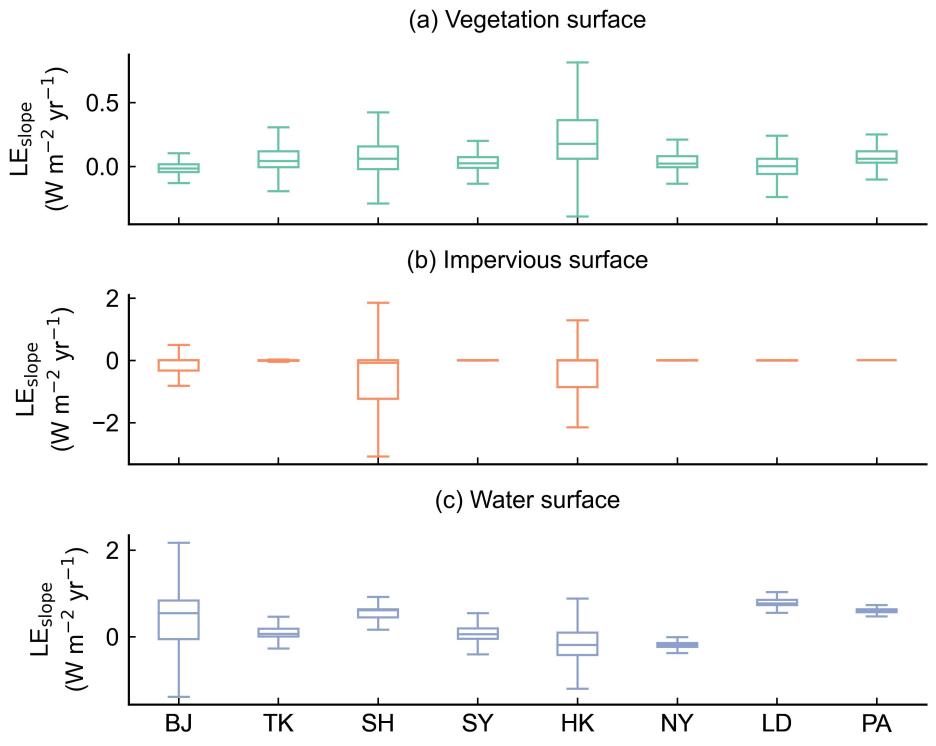


**Supplementary Figure 2.** Distribution of urban LE flux trends (1990-2022) across different surface types in global cities. City abbreviations: BJ = Beijing, TK = Tokyo, SH = Shanghai, SY = Sydney, HK = Hong Kong–Shenzhen, NY = New York, LD = London, PA = Paris.


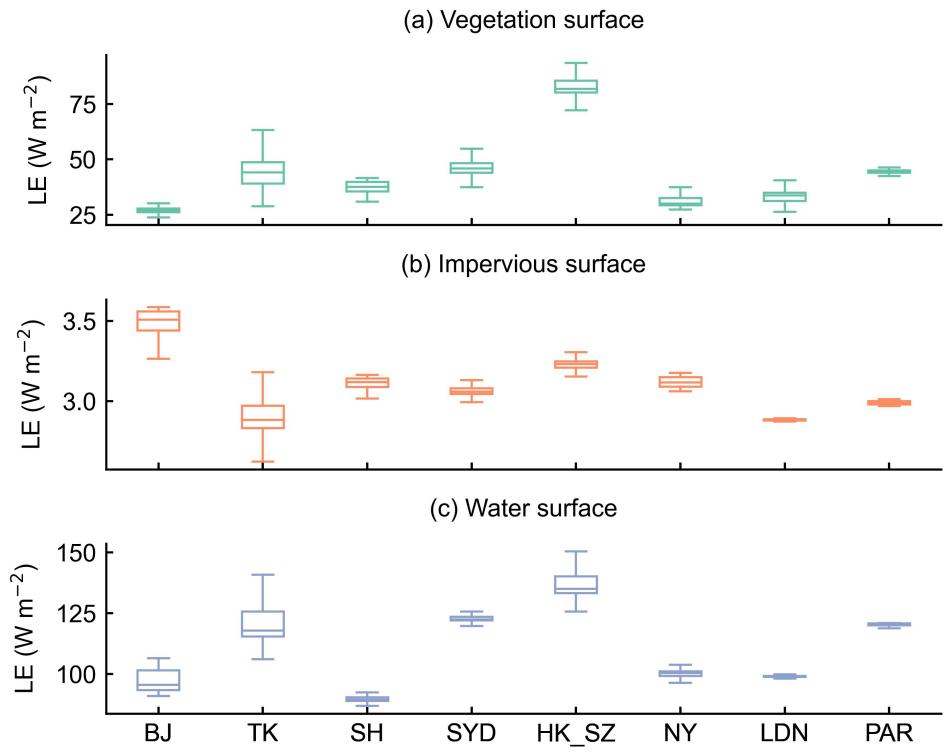


**Supplementary Figure 3.** Distribution of urban LE flux values in 2022 across different surface types in global cities. City abbreviations: BJ = Beijing, TK = Tokyo, SH = Shanghai, SY = Sydney, HK = Hong Kong–Shenzhen, NY = New York, LD = London, PA = Paris.


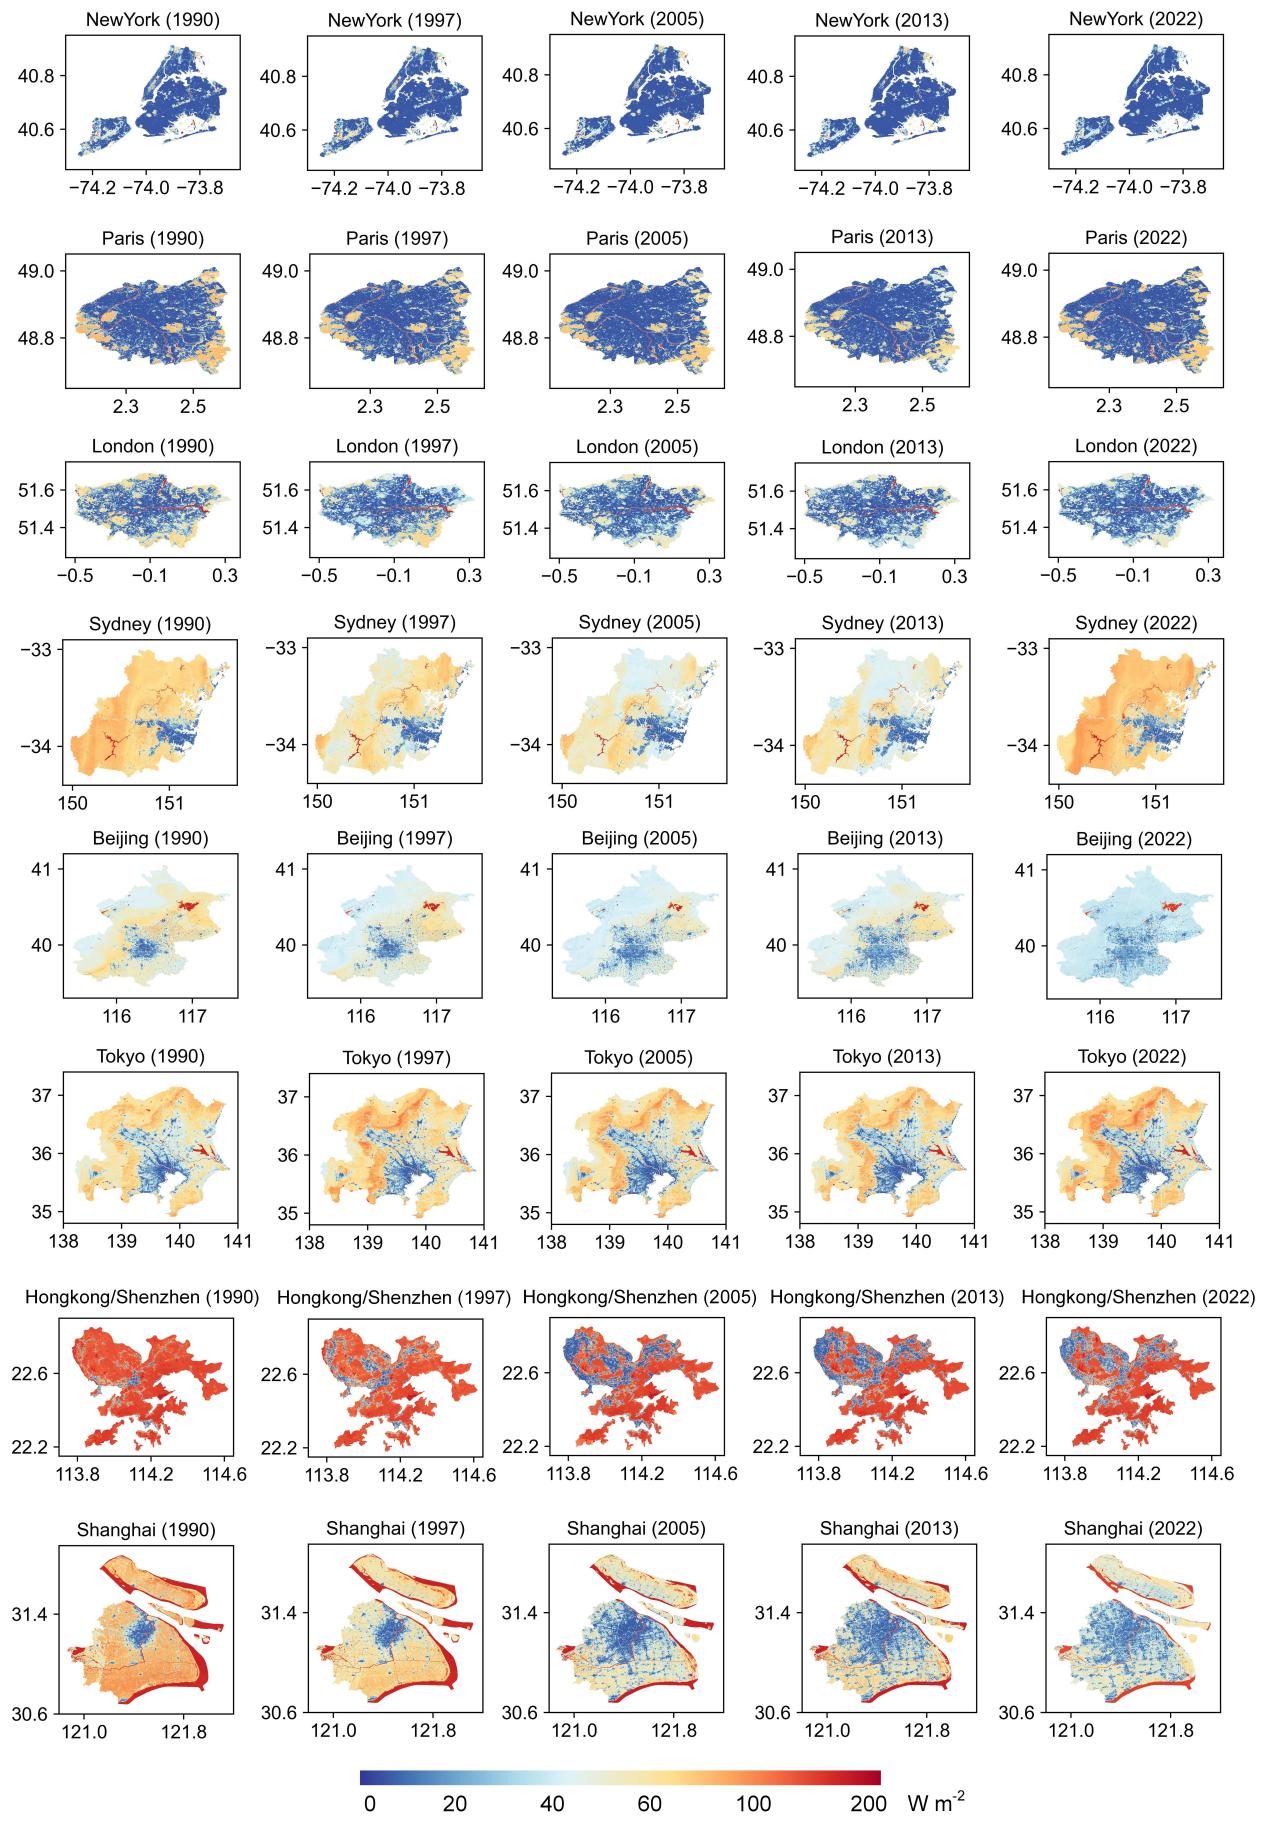


**Supplementary Figure 4.** Spatial distribution of annual average LE across eight representative cities from 1990 to 2022. Each row corresponds to a specific city, and each column represents one of five selected years (1990, 1997, 2005, 2013, and 2022).


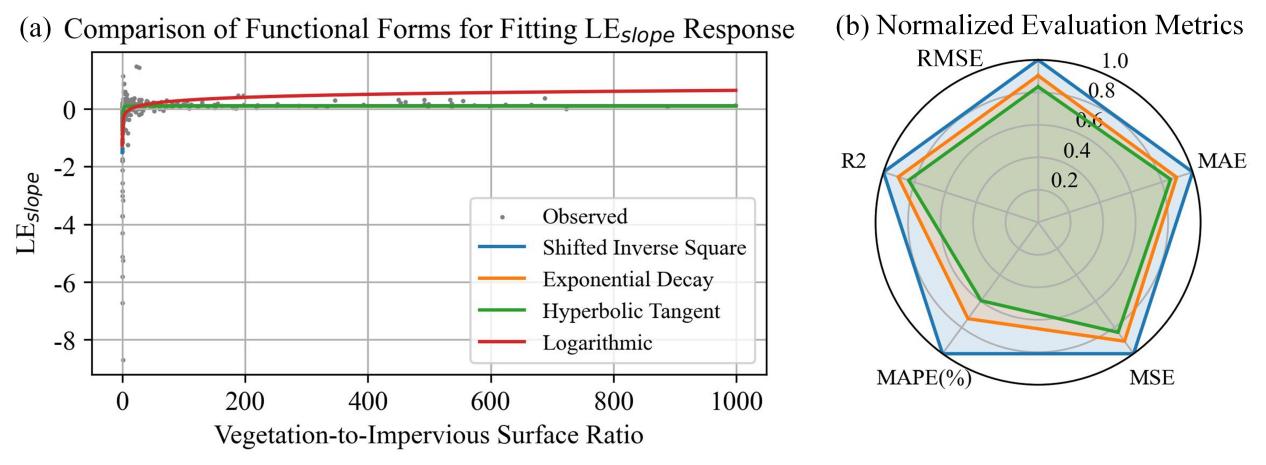


**Supplementary Figure 5.** (a) Comparison of functional forms for fitting the relationship between vegetation fraction and LEslope. (b) Normalized radar chart comparing fitting performance across functions.


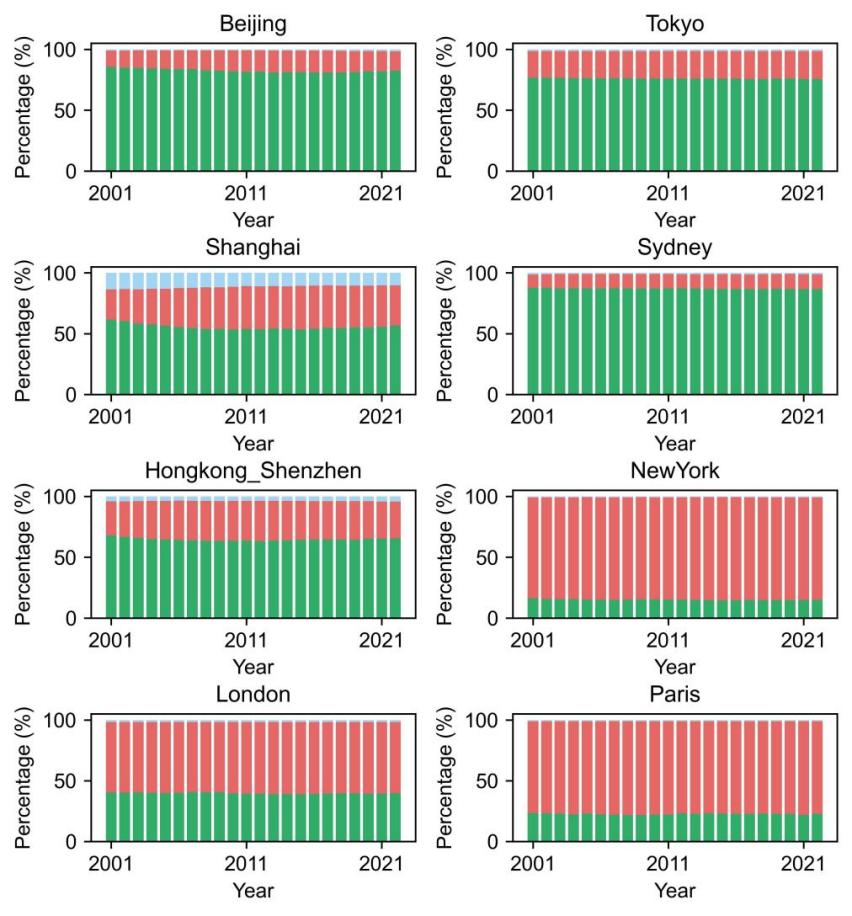


**Supplementary Figure 6.** Changes in land cover composition (vegetation, impervious surfaces, and water) from 2001 to 2021 in eight global cities.


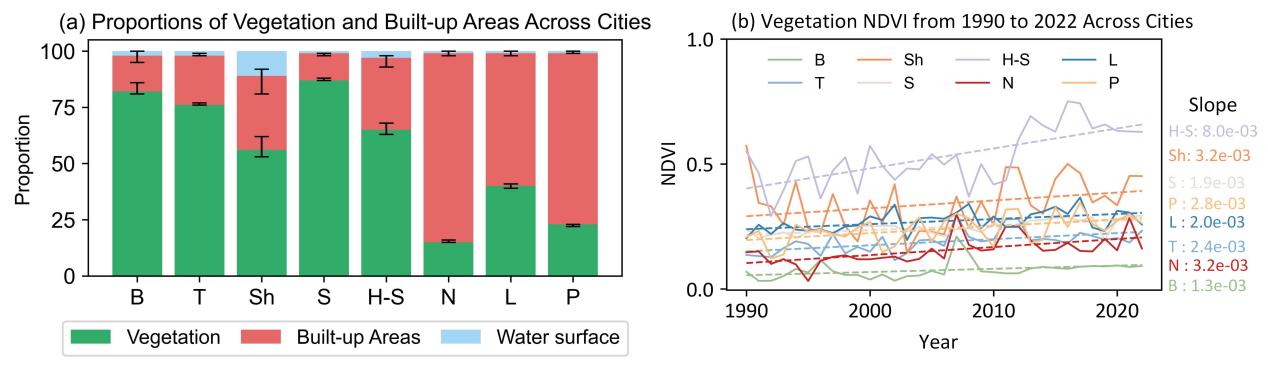


**Supplementary Figure 7.** (a) Proportional composition of vegetation, impervious surfaces, and water bodies in eight representative global cities. (b) Temporal variation in NDVI of vegetated areas from 1990 to 2022, reflecting long-term greenness trends.


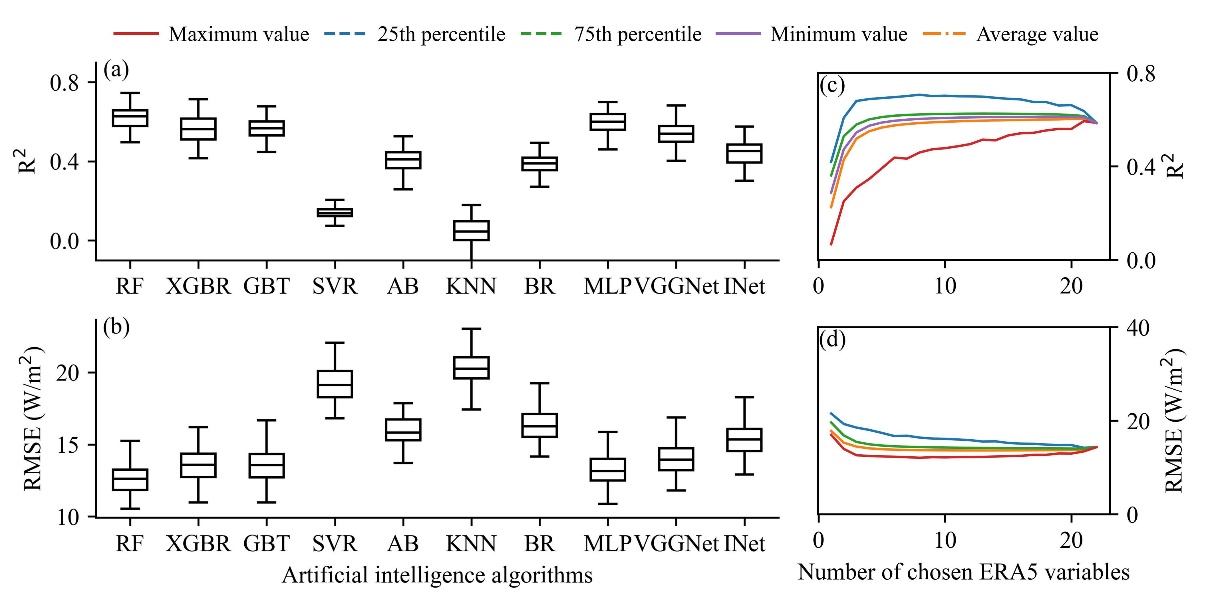


**Supplementary Figure 8.** Performance of AI models and variable combinations in simulating vegetation LE flux (a, b) R² and RMSE of ten artificial intelligence models used to simulate vegetation LE flux. (c, d) R² and MSE of the optimal variable combinations across different combination sizes. Performance metrics were evaluated using cross-validation across global city samples.

**Supplementary Tables**

**Supplementary Table 1.** Variables and data sources for urban LE analysis.

|  | **Description** | **Data Source** |
| --- | --- | --- |
| LAI_mean | Mean annual urban Leaf Area Index (LAI) from 2001 to 2022 | MODIS/061/MCD15A3H |
| LAI_slope | Temporal trend in annual urban LAI from 2001 to 2022 | MODIS/061/MCD15A3H |
| LST_mean | Mean annual urban land surface temperature (LST) from 2001 to 2022 | MODIS/006/MOD11A2 |
| LST_slope | Temporal trend in annual urban LST from 2001 to 2022 | MODIS/006/MOD11A2 |
| Pop_mean | Mean annual urban population count from 2001 to 2022 | WorldPop/GP/100m/pop |
| Pop_slope | Temporal trend in urban population count from 2001 to 2022 | WorldPop/GP/100m/pop |
| ISF_mean | Mean annual fraction of impervious surfaces in urban areas from 2001 to 2022 | MODIS/006/MCD12Q1 |
| ISF_slope | Temporal trend in impervious surface fraction in urban areas from 2001 to 2022 | MODIS/006/MCD12Q1 |
| Rad_2020 | Average nighttime light radiance in urban areas in 2020 | NOAA/VIIRS/DNB/MONTHLY_V1/VCMSLCFG |
| Tair_mean | Mean annual air temperature at 2 m | ECMWF/ERA5_LAND/MONTHLY_AGGR |
| Tair_slope | Temporal trend of air temperature at 2 m | ECMWF/ERA5_LAND/MONTHLY_AGGR |
| Tmax_mean | Mean annual maximum air temperature at 2 m | ECMWF/ERA5_LAND/MONTHLY_AGGR |
| Tmax_slope | Temporal trend of maximum air temperature at 2 m | ECMWF/ERA5_LAND/MONTHLY_AGGR |
| Tmin_mean | Mean annual minimum air temperature at 2 m | ECMWF/ERA5_LAND/MONTHLY_AGGR |
| Tmin_slope | Temporal trend of minimum air temperature at 2 m | ECMWF/ERA5_LAND/MONTHLY_AGGR |
| Precip_mean | Mean annual total precipitation | ECMWF/ERA5_LAND/MONTHLY_AGGR |
| Precip_slope | Temporal trend of total precipitation | ECMWF/ERA5_LAND/MONTHLY_AGGR |
| Uwind_mean | Mean annual east-west wind speed at 10 m | ECMWF/ERA5_LAND/MONTHLY_AGGR |
| Uwind_slope | Temporal trend of east-west wind speed at 10 m | ECMWF/ERA5_LAND/MONTHLY_AGGR |
| Vwind_mean | Mean annual north-south wind speed at 10 m | ECMWF/ERA5_LAND/MONTHLY_AGGR |
| Vwind_slope | Temporal trend of north-south wind speed at 10 m | ECMWF/ERA5_LAND/MONTHLY_AGGR |
| SP_mean | Mean annual surface pressure | ECMWF/ERA5_LAND/MONTHLY_AGGR |
| SP_slope | Temporal trend of surface pressure | ECMWF/ERA5_LAND/MONTHLY_AGGR |
| DPT_mean | Mean annual dew point temperature at 2 m | ECMWF/ERA5_LAND/MONTHLY_AGGR |
| DPT_slope | Temporal trend of dew point temperature at 2 m | ECMWF/ERA5_LAND/MONTHLY_AGGR |

**Supplementary Table 2.** Parameters potentially associated with LE from ERA5-land.

| Serial number | Parameter Name | Abbreviation | Description | Serial number | Parameter Name | Abbreviation | Description |
| --- | --- | --- | --- | --- | --- | --- | --- |
| 1 | temperature_2m | T | Temperature at 2 meters above ground level. | 12 | soil_temperature_level_4 | ST4 | Soil temperature at depth approximately 100-289 cm. |
| 2 | dewpoint_temperature_2m | DT | Dewpoint temperature at 2 meters above ground level. | 13 | skin_temperature | ST | Skin temperature (temperature of the Earth's surface). |
| 3 | u_component_of_wind_10m | UW | Eastward wind component at 10 meters above ground level. | 14 | surface_latent_heat_flux_sum | SLE | Total sum of LE at the surface. |
| 4 | v_component_of_wind_10m | VW | Northward wind component at 10 meters above ground level. | 15 | surface_net_thermal_radiation_sum | STR | Total net thermal radiation at the surface. |
| 5 | surface_pressure | SP | Air pressure at the surface. | 16 | surface_sensible_heat_flux_sum | SSH | Total sum of sensible heat flux at the surface. |
| 6 | leaf_area_index_high_vegetation | LIH | Leaf area index for high vegetation. | 17 | surface_solar_radiation_downwards_sum | SRD | Total downward solar radiation at the surface. |
| 7 | leaf_area_index_low_vegetation | LIL | Leaf area index for low vegetation. | 18 | volumetric_soil_water_layer_1 | SW1 | Volumetric soil water content at depth approximately 0-7 cm. |
| 8 | surface_net_solar_radiation_sum | Rn | Total net solar radiation at the surface. | 19 | volumetric_soil_water_layer_2 | SW2 | Volumetric soil water content at depth approximately 7-28 cm. |
| 9 | soil_temperature_level_1 | ST1 | Soil temperature at depth approximately 0-7 cm. | 20 | volumetric_soil_water_layer_3 | SW3 | Volumetric soil water content at depth approximately 28-100 cm. |
| 10 | soil_temperature_level_2 | ST2 | Soil temperature at depth approximately 7-28 cm. | 21 | volumetric_soil_water_layer_4 | SW4 | Volumetric soil water content at depth approximately 100-289 cm. |
| 11 | soil_temperature_level_3 | ST3 | Soil temperature at depth approximately 28-100 cm. | 22 | forecast_albedo | FA | The reflectivity of the Earth's surface. |

**Supplementary Table 3.** Summary of LEslope model thresholds and rationale for eight global cities.

| City | Climate type | LEA (W m⁻² yr⁻¹) | DIT (veg to build) | ST (veg to build) | Rationale |
| --- | --- | --- | --- | --- | --- |
| Beijing | Semi-arid continental | 0.03 | 0.58 | 3.01 | LEA is low, DIT and ST are high, indicating limited vegetation effect and high greening requirements. |
| Tokyo | Temperate humid | 0.08 | 0.38 | 2.81 | Moderate LEA, low DIT indicates sensitive LE_slope response to vegetation change. |
| Shanghai | Subtropical humid | 0.09 | 0.66 | 2.92 | High LEA with slightly elevated DIT, suggesting morphological suppression of vegetative effects. |
| Sydney | Temperate oceanic | 0.08 | 0.63 | 3.06 | Similar to Shanghai, with a flatter LE_slope curve and delayed saturation benefits. |
| Hong Kong-Shenzhen | Subtropical humid + anthropogenic heat | 0.12 | 0.35 | 2.78 | High LEA and low DIT, indicative of a highly sensitive and vegetation-dependent urban heat regulation system. |
| New York | Temperate continental | 0.10 | 0.38 | 2.81 | Slightly higher LEA, with moderate DIT reflecting a stable ecological response. |
| London | Temperate oceanic | 0.10 | 0.28 | 2.71 | Very sensitive city with the lowest DIT, indicating that minor greening variations rapidly affect LE_slope behavior. |
| Paris | Temperate oceanic | 0.08 | 0.49 | 2.92 | Stable profile with moderate vegetation response and a slightly higher saturation threshold. |

Table Notes: This table summarizes the theoretical LE response capacity (LEA), vegetation sensitivity threshold (DIT), and saturation point (ST) derived from nonlinear curve fitting of the LEslope-vegetation relationship. The final column provides interpretative assessments of each city’s ecological and climatic response characteristics, contextualizing their position along the urbanization-climate adaptation spectrum.

**Supplementary Methods**

## **Supplementary Method 1 ERA5-Land Variable Selection and Combination Strategy**

A total of 22 ERA5-Land variables potentially associated with LE flux—including air temperature, radiation, soil moisture at multiple depths, and wind components—were considered (Supplementary Table 1). These variables were grouped into five categories: atmospheric conditions, surface energy balance, soil thermal properties, hydrological variables, and near-surface meteorology.

To identify the most effective input combinations, we conducted a brute-force variable combination analysis covering all 4,194,304 non-redundant subsets (1–22 variables). For each subset, models were trained and validated using ten machine-learning algorithms representing seven major categories:

(1) Tree-based (Random Forest (Breiman 2001); XGBoost (Chen and Guestrin 2016); Gradient Boosting Trees (Friedman 2001)),

(2) Kernel-based (Support Vector Regressor (Cortes and Vapnik 1995)),

(3) Ensemble methods (Adaptive Boosting (Margineantu and Dietterich 1997)),

(4) Nearest-neighbor-based (K-Nearest Neighbors (Cover and Hart 1967)),

(5) Bayesian,

(6) Neural networks (Multi-layer Perceptron (Taud and Mas 2018)), and

(7) Deep learning (VGGNet, Inception Network).

Each model underwent 100 iterations of 10-fold cross-validation, and the best-performing subset was identified based on mean R² and RMSE.

The resulting model was further validated against FLUXNET2015 tower measurements, and all trained models are openly available at https://zenodo.org/records/17430581.

## **Supplementary Method 2 Function Selection and Fitting Analysis of LE Response**

To assess the nonlinear relationship between LE and the vegetation-to-impervious surface ratio, we compared four candidate functions: a shifted inverse-square, an exponential decay, a hyperbolic tangent, and a logarithmic function. Each function is defined as a nonlinear response y = f(x), where x is the normalized vegetation-to-impervious surface ratio, y is the corresponding LE value, and a, b, and c are fitted parameters. A small constant (ε = 10-6) was introduced to avoid division or logarithmic errors near zero. Observations with x ≤ 0 were excluded, and model fitting was performed using nonlinear least squares via Python’s curve_fit.

Shifted inverse-square function:

Exponential decay function:

Hyperbolic tangent function:

Logarithmic function function:

Model performance was evaluated using five metrics—RMSE, MAE, MSE, MAPE(%), and R²—all normalized to [0, 1] (Supplementary Figure 5). A more outward and uniform radar shape indicates stronger overall performance. The shifted inverse-square function outperformed the others (RMSE = 0.776, R² = 0.210), followed by the exponential decay and hyperbolic tangent models. The logarithmic function had the weakest fit (R² = 0.153), indicating limited suitability.

To guide model selection beyond statistical fit, we introduced three physical criteria: (1) LE slope should asymptotically stabilize at high x, reflecting saturation; (2) a sharp decline should occur below a threshold, indicating loss of evaporative regulation; (3) as x approaches zero, the LE slope should diverge negatively, capturing degradation in sealed urban surfaces.

Taken together, the shifted inverse-square function was selected as the most suitable model. It captures key nonlinearities, aligns with physical expectations, and enables robust application in mechanistic interpretation and spatial modeling.

**Supplementary** **References**

Breiman L, 2001. Random Forests*.* Mach Learn. 45, 5-32. 10.1023/A:1010933404324.

Chen T, Guestrin C (2016) Xgboost: A scalable tree boosting system. In. pp. 785--794.

Cortes C, Vapnik V, 1995. Support-vector networks*.* Mach Learn. 20, 273-297. https://doi.org/10.1007/BF00994018.

Cover T, Hart P, 1967. Nearest neighbor pattern classification*.* Ieee T Inform Theory. 13, 21--27. https://doi.org/10.1109/TIT.1967.1053964.

Friedman JH, 2001. Greedy function approximation: a gradient boosting machine*.* Ann Stat., 1189--1232. http://www.jstor.org/stable/2699986.

Margineantu DD, Dietterich TG (1997) Pruning adaptive boosting. In. pp. 211--218. (Citeseer)

Taud H, Mas J, 2018. Multilayer perceptron (MLP)*.* Geomatic Approaches for Modeling Land Change Scenarios., 451--455. https://doi.org/10.1007/978-3-319-60801-3_27.
